# Supplementary material for: Early Jurassic climate and atmospheric CO 2 concentration in the Sichuan paleobasin, southwestern China
Source: Copernicus journal article supplement (doi:10.5194/cp-16-2055-2020), 2020-11-04
Supplement: Supplementary file 1 [file cp-16-2055-2020-supplement.zip]

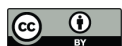

## *Supplement of*

# **Early Jurassic climate and atmospheric CO<sub>2</sub> concentration in the Sichuan paleobasin, southwestern China**

**Xianghui Li et al.**

*Correspondence to:* Xianghui Li (leeschhui@126.com)

- cp-16-2055-2020-supplement-title-page.pdf
- Fig.S1-log-Ya'an.jpg
- Fig.S2-log-Hechuan.jpg
- Fig.S3-lithofacies photo1-field.jpg
- Fig.S4-lithofacies photo2-micro.jpg
- Fig.S5-lithofacies-karst photo.jpg
- Fig.S6-correlated logs-N Sichuan.jpg
- Note S1-facies determination.docx
- Table S1-J1 climate-sensitive sedi-Sichuan.xlsx
- Table S2-J1 calcisol data-two sections.xlsx
- Table S3-C-O isotopes of J1 lacustrine limestone.xlsx
- Table S4-C-O iso & pCO<sub>2</sub> data, Ya'an.xlsx
- Table S5-pCO<sub>2</sub> uncertainty using organic matter.xlsx
- Table S6-J1 Composite pCO<sub>2</sub> Data by stomata.xlsx
- Table S7-J1 Composite pCO<sub>2</sub> Data by paleosol.xlsx
- Table S8-pCO<sub>2</sub> uncertainty using carbonate.xlsx

The copyright of individual parts of the supplement might differ from the CC BY 4.0 License.
