# Supplementary material for: Early Jurassic climate and atmospheric CO 2 concentration in the Sichuan paleobasin, southwestern China
Source: Copernicus journal article supplement (doi:10.5194/cp-16-2055-2020), 2020-11-04
Supplement: Supplementary file 3 [file Table S2-J1 calcisol data-two sections.xlsx]

## Sheet: Sheet1
Table S2 Early Jurassic paleosols in Ya'an of Sichuan and Hechuan of Chongqing, Southwest China
Numbers	Mem-bers		Paleosols					Calcretes			(Sub-) Facies
		Age	Depth (m)	Structure	Color	Mansell color	BK (cm)	Size (cm)	Shape	Percent (%)
1. Shaping section, Ya'an
J1z-01-01	Zhengzhuchong	Sinemurian	4.5	Subangular and prismatic peds; slickenside; abundant rhizolith	Dusky red	5R 3/4	170	1-3	Ginger-like, unregular	<1	Overbank
J1z-02-001			6.5	Subangular peds; slickenside	Dusky red	5R 3/4	120	1-3	Ginger-like, ellipsoid	<1	Overbank
J1z-02-002			7.3	Subangular peds; slickenside	Dusky red	5R 3/4	30	1-4	Ginger-like, unregular	<1	Overbank
J1z-02-01			9.8	Angular peds; slickenside	Dusky red	5R 3/4	90	0.5-1.5	Ginger-like, subglobal	<1	Overbank
J1z-02-02			12.7	Subangular peds; slickenside	Dusky red	5R 3/4	120	1-3	Ginger-like, unregular	<1	Overbank
J1z-03-01			16.3	Angular ped, slickenside, mottles	Grayish red	5R 4/2	76	1-3	Ginger-like, unregular	<1, up to 3-5	Overbank
J1z-04-01			31.7	Subangular peds; slickenside	Dusky red	5R 3/4	70	0.5-1.5	Subglobular, ellipsoid	<1	Split fan-overbank
J1z-05-01			39.6	Subangular peds; slickenside	Dusky red	5R 3/4	45	1-3	Ginger-like, unregular	<2	Split fan-overbank
J1z-05-02			45.5	Angular peds; slickenside	Dusky red	5R 3/4	63	3-5	Ginger-like, ellipsoid	5-10	Split fan-overbank
J1z-06-01a			54	Subangular peds; slickenside	Dusky red	5R 4/2	90	0.5-3	Ginger-like, unregular	<0.5	Split fan-overbank
J1z-06-01b			55.3	Angular ped, slickenside, mottles	Dusky red	5R 4/2	80	0.5-3	Ginger-like, unregular	<0.5	Split fan-overbank
J1z-06-01			56.72	Subangular peds; slickenside	Dusky red	5R 4/2	15	0.5-3	Ginger-like, ellipsoid	<0.5	Split fan-overbank
J1z-06-01d			57.6	Subangular peds; slickenside	Dusky red	5R 4/2	40	0.5-3	Ginger-like, ellipsoid	<0.5	Split fan-overbank
J1z-07-01a			65.4	Angular ped, slickenside, mottles	Dusky red	5R 4/2	30	1-2	Ginger-like, unregular	<0.5	Interchannel
J1z-07-01b			66.9	Subangular peds; slickenside	Dusky red	5R 4/2	20	1-2	Ginger-like, unregular	<0.5	Interchannel
J1z-07-01			69.8	Subangular peds; slickenside	Dusky red	5R 4/2	20	1-2	Ginger-like, unregular	<0.5	Interchannel
J1z-08-01	Ma'anshan	Pleinsbachian	84.65	Subangular ped, slickenside	Dusky red	5R 4/2	50	2-4	Unregular, ellipsoid	<1	Flood plain
J1z-10-01			89.5	Subangular ped, slickenside	Dusky red	5R 4/2	135	2-15	Unregular, ellipsoid, globular	<1	Flood plain
J1z-10-02			94.35	Angular ped, slickenside, mottles	Dusky red	5R 4/2	50	0.5-1.5	Ginger-like	<0.5	Flood plain
J1z-11-01			106.65	Subangular ped, slickenside	Blackish red	5R 2/2	70	1-5	Ginger-like	<1	Flood plain
J1z-11-02			111.7	Subangular ped, slickenside	Blackish red	5R 2/2	75	1-2	Ginger-like, subglobal	<1	Flood plain
J1z-12-01			148.85	Angular ped, slickenside, mottles	Blackish red	5R 2/2	30	2-8	Ginger-like presominant	<1	Overbank
J1z-14-01			176.05	Angular ped, slickenside, mottles	Blackish red	5R 2/2	42	2-3	Ginger-like	<0.5	Interchannel
J1z-14-02			187.3	Subangular ped, slickenside	Blackish red	5R 2/2	110	1-3	Ginger-like, ellipsoid	<1	Interchannel
J1z-15-01			194.25	Angular ped, slickenside, mottles	Blackish red	5R 2/2	120	1-3	Ginger-like, ellipsoid	<1	Overbank
J1z-16-01			213.67	Subangular ped, slickenside	Blackish red	5R 2/2	62	1-3	Ginger-like	<0.5	Flood plain
J1z-18-01		Toarcian	252.69	Subangular ped, slickenside	Blackish red	5R 2/2	66	1-3	Ginger-like	<0.5	Flood plain
J1z-19-01	Da'anzhai		272.27	Platy ped	Blackish red	5R 2/2	120	0.5-1.2	Ginger-like, subglobal	<0.2	Back lakeshore
J1z-20-01			294.26	Platy ped, slickenside	Blackish red	5R 2/2	83	0.5-1.5	Ginger-like, ellipsoid	<0.2	Back lakeshore
J1z-22-01			324.52	Platy ped	Blackish red	5R 2/2	32	1-3	Ginger-like, ellipsoid	<0.5	Back lakeshore
J1z-23-01			334.77	Platy ped	Blackish red	5R 2/2	32	1-3	Ginger-like, ellipsoid	<0.5	Back lakeshore
2. Tanba and Maliuping section, Hechuan
18CH-07a	Ma'anshan	Plien	375.1	Angular ped, slickenside	Grayish red	5R 4/2	80	0.2-0.5	Subglobular, ellipsoid	<1	Split fan-overbank
18CH-07b			381.4	Subangular ped, slickenside, mottle, rootlet, leaching, mudcrack	Dark reddish brown	10R 3/4	150	0.2-0.5	Ginger-like, ellipsoid	<1	Split fan-overbank
18CH-07c			384.1	Angular ped, slickenside, mottles	Pale reddish brown	10R 5/4	40	0.5-2	Ginger-like, ellipsoid	<1	Split fan-overbank
18HC-10	Da'anzhai	Toa	464.4	Subangular ped, slickenside, mottle	Moderate red and yellowish gray	5R 4/6	130	1-2	Ginger-like, ellipsoid	3-10	Back lakeshore
18HC-11			501	Subangular ped, slickenside, mottle, leaching, rootlet, burrow	Dusky red	5R 4/2	45	0.5-2	Ginger-like, subglobal	<1	Back lakeshore
