# Supplementary material for: Early Jurassic climate and atmospheric CO 2 concentration in the Sichuan paleobasin, southwestern China
Source: Copernicus journal article supplement (doi:10.5194/cp-16-2055-2020), 2020-11-04
Supplement: Supplementary file 4 [file Table S3-C-O isotopes of J1 lacustrine limestone.xlsx]

## Sheet: C-O-limestone
Table S3 Carbon-oxygen isotopes of lacustrine carbonates from the Lower Jurassic Ziliujing Fm (Da'anzhai Mem) in GSB
Section	Sample	Depth (m)	Lithology	δ13C	δ12O
A4, Shaping section, Ya'an
	J1z-19S	275.02	Mudstone	-4.07486	-12.2811
	J1z-20S1	285.02	Dolomitic mudstone	-3.03386	-11.128
	J1z-20S2	288.82	Dolomitic mudstone	-2.73586	-10.667
	J1z-20S3	289.52	Dolomitic mudstone	-3.47729	-11.2853
	J1z-20S4	293.92	Dolomitic mudstone	-2.68157	-10.4973
	J1z-21S1	308.92	Marlstone	-3.60114	-11.3769
	J1z-21S2	312.62	Marlstone	-2.54214	-10.5193
	J1z-21S3	315.12	Marlstone	-2.02257	-9.91343
	J1z-21S4	316.92	Marlstone	-2.47871	-10.3619
	J1z-21S5	318.62	Marlstone	-2.30786	-10.3977
A5, Gaodongqiao section, Zigong (Wang et al., 2006)
	ZG20b1		Shelly wackestone	-3.29	-9.14
	ZG21b1		Shelly mudstone	-4.49	-8.16
	GJ010b7		Shelly mudstone	-0.85	-6.78
	GJ010b6		Shelly mudstone	-2	-7.26
	GJ010b5		Shelly mudstone	-1.63	-8.62
	GJ010b4		Shelly wackestone	-2.66	-8.52
	GJ010b3		Shelly mudstone	-1.64	-7.11
	GJ010b2		Mudstone	-2.41	-8.01
	GJ010b1		Mudstone	-1.48	-6.75
A6, Tanba section, Hechuan (Wang et al., 2006)
	CQ 001b2		Shelly wackestone	-0.08	-7.48
	CQ 001b222		Shelly mudstone	0.76	-6.63
	CQ 001b3		Shelly wackestone	0.35	-8.08
	CQ 001b4		Mudstone	-1.21	-6.15
	CQ 001b5		Shelly wackestone	-3.46	-8.52
	CQ 001b6		Mudstone	1.62	-4.56
Wang, Q. W., Liang, B., and Kan, Z. Z.: Carbon and oxygen isotopic compositions of lacustrine carbonates of the Early Jurassic Ziliujing Formation in the Sichuan Basin and their paleolimnological significance, J. Min. Petr., 26(2), 87-91, 2006 (in Chinese with English abstract).
