# Supplementary material for: Early Jurassic climate and atmospheric CO 2 concentration in the Sichuan paleobasin, southwestern China
Source: Copernicus journal article supplement (doi:10.5194/cp-16-2055-2020), 2020-11-04
Supplement: Supplementary file 5 [file Table S4-C-O iso & pCO2 data, Ya'an.xlsx]

## Sheet: data
Table S4 pCO2 estimate by carbon isotope of pedogenic carbonates from the Lower Jurassic Ziliujing Fm at the Shaping section, Ya'an of Sichuan
1	2	3	4	5	6	7	8	9	10	11	12	13	14	15	16	17	18
Mem-ber	Calcrete sample	BK (cm)	LO (cm)	Depth (m)	Age (Ma)	δ13C	δ18O	δ18Oc	δ13Cc	δ13Cs	δ13Csc	δ13Cr	δ13Ca	pCO2	pCO2	pCO2	pCO2
Zhengzhuchong	J1Z-01-01A	170	30	4.5	198.78	-7.933	-12.646	-12.81	-7.81	-16.79	-16.6406	-26.93	-7.50909	1423.35	1644.84	1262.48	1315.87
	J1Z-01-01B					-7.696	-12.971
	J1z-02-001A	120	100	6.5	198.55	-7.868	-12.9811	-12.6	-8.1	-17.08	-16.928	-26.97	-7.54545	1325.3	1534.95	1176.49	1227.96
	J1z-02-001B					-8.23657	-12.309
	J1z-02-002A	30	25	7.3	198.45	-7.711	-12.6147	-12.8	-7.8	-16.78	-16.6307	-27.18	-7.73636	1488.23	1762.07	1353.35	1409.65
	J1z-02-002B					-7.80743	-13.0803
	J1Z-02-01A	90	60	9.8	198.16	-7.501	-13.216	-12.95	-7.37	-16.35	-16.2045	-27.62	-8.13636	1774.5	2211.5	1702.42	1769.2
	J1Z-02-01B					-7.24	-12.68
	J1z-02-02A	120	100	12.7	197.83	-7.41229	-13.2633	-13.1	-7.4	-16.38	-16.2342	-27.52	-8.04545	1736.11	2139.17	1646.42	1711.34
	J1z-02-02B					-7.39729	-12.861
	J1Z-03-01A	76	56	16.3	197.41	-6.886	-10.603	-11.31	-6.9	-15.88	-15.7387	-27.37	-7.90909	1921.76	2347.43	1809.19	1877.95
	J1Z-03-01B					-6.905	-12.017
	J1Z-04-01A	70	40	31.7	195.63	-6.67	-11.463	-12.02	-6.27	-15.25	-15.1143	-26.7	-7.3	2047.85	2336.5	1803.14	1869.2
	J1Z-04-01B					-5.868	-12.585
	J1Z-05-01A					-8.089	-13.475
	J1Z-05-01B	45	10	39.6	194.71	-6.11	-11.065	-11.35	-5.83	-14.81	-14.6782	-26.5	-7.11818	2228.22	2492.86	1925.84	1994.29
	J1z-05-01C					-5.54486	-11.6351
	J1Z-05-02A					-8.026	-12.502
	J1Z-05-02B	63	45	45.5	194.03	-5.094	-12.825	-12.01	-5.87	-14.85	-14.7178	-26.05	-6.70909	2070.25	2199.72	1698.73	1759.77
	J1z-05-02C					-6.65343	-11.1974
	J1z-06-01A	15	12	56.7	192.73	-6.58186	-12.5809	-12.8	-6.4	-15.38	-15.2431	-26.03	-6.69091	1791.82	1900.51	1464.95	1520.41
	J1z-06-01B					-6.31557	-13.0163
	J1z-07-01A	20	15	69.8	191.21	-5.86343	-12.478	-12.8	-6.1	-15.08	-14.9458	-26.57	-7.18182	2099.91	2363.84	1824.95	1891.07
	J1z-07-01B					-6.39486	-13.1934
DYM	J1Z-08-01A	50	30	84.7	190.31	-6.064	-12.406	-12.89	-6.11	-15.09	-14.9557	-27.48	-8.00909	2360.57	2967.35	2290.92	2373.88
	J1Z-08-01B					-6.164	-13.378
Ma'anshan	J1Z-10-01A	135	35	89.5	190.06	-6.726	-13.209	-12.91	-7.18	-16.16	-16.0162	-27.39	-7.92727	1798.79	2192.62	1688.51	1754.09
	J1Z-10-01B					-7.639	-12.605
	J1Z-10-02A	50	20	94.4	189.81	-7.541	-13.506	-12.17	-7.86	-16.84	-16.6901	-27.08	-7.64545	1440.8	1688.57	1296.24	1350.86
	J1Z-10-02B					-8.568	-11.409
	J1z-10-02C					-7.46714	-11.6019
	J1z-11-01A	70	60	106.7	189.18	-7.06657	-12.6303	-12.6	-7.1	-16.08	-15.9369	-26.35	-6.98182	1562.09	1711.06	1315.85	1368.85
	J1z-11-01B					-4.27471	-6.72143
	J1z-11-02A	75	65	111.7	188.92	-7.47	-12.6921	-12.6	-7.6	-16.58	-16.4324	-25.98	-6.64545	1268.43	1344.1	1029.6	1075.28
	J1z-11-02B					-7.64729	-12.5524
	J1Z-12-01A	30	10	148.9	187.01	-8.434	-11.518	-12.68	-8.08	-17.06	-16.9082	-26.15	-6.8	1137.56	1225.96	936.659	980.771
	J1Z-12-01B					-7.716	-13.85
	J1Z-14-01A	42	10	176.1	185.61	-7.719	-13.826	-13.78	-7.35	-16.33	-16.1847	-26.45	-7.07273	1484.33	1641.18	1260.93	1312.94
	J1Z-14-01B					-6.979	-13.74
	J1Z-14-02A	110	45	187.3	185.03	-6.324	-13.34	-13	-5.98	-14.96	-14.8269	-25.88	-6.55455	1960.36	2045.08	1578.47	1636.06
	J1Z-14-02B					-5.631	-12.668
	J1z-15-01A	120	110	194.3	184.67	-6.99386	-13.3253	-12.8	-7	-15.98	-15.8378	-25.75	-6.43636	1446.02	1495.92	1149.1	1196.74
	J1z-15-01B					-7.08557	-12.3013
	J1Z-16-01A	62	12	213.7	183.67	-5.98	-12.073	-12	-5.54	-14.52	-14.3908	-25.97	-6.63636	2233.25	2351.4	1817.5	1881.12
	J1Z-16-01B					-7.453	-13.041
	J1z-16-01C					-5.098	-11.978
	J1Z-18-01A	66	32	252.7	182.6	-3.413	-5.178	-5.55	-3.52	-12.5	-12.3887	-25.1	-5.84545	3462.68	3217.68	2497.67	2574.14
	J1Z-18-01B					-3.618	-5.926
Da'anzhai	J1Z-19-01A	120	80	272.3	181.87	-6.082	-12.673	-12.59	-6.09	-15.07	-14.9359	-24.5	-5.3	1498.77	1367.79	1051.75	1094.23
	J1Z-19-01B					-6.106	-12.503
	J1Z-20-01A	83	49	294.3	181.04	-5.466	-10.66	-10.37	-5.63	-14.61	-14.48	-27	-7.57273	2499.63	2981.95	2304.53	2385.56
	J1Z-20-01B					-5.799	-10.074
	J1Z-22-01A	32	5	324.5	179.91	-4.091	-7.683	-7.43	-4.14	-13.12	-13.0032	-25.8	-6.48182	3169.76	3262.44	2528.86	2609.95
	J1Z-22-01B					-4.198	-7.167
	J1z-23-01A	32	5	334.8	179.52	-7.584	-11.842	-11.7	-8	-16.98	-16.8289	-26.9	-7.48182	1345.03	1548.48	1187.25	1238.78
	J1z-23-01B					-8.33129	-11.575
Notes:													Mean	1868.28	2075.96	1600.07	1660.77
1	DYM, Dongyuemiao Member
2	Captital letters A and B/C after the same sample number mean different podwer drilling in the same calcrete
3	BK thickness (cm)
4	Horizon (cm) of calcrete sample to the base of individual BK
5	Location (cm) of calcrete sample at the depth in the whole section (log)
6	Rough age (Ma) arranged by thickness distribution confined by the members in Table 1. Stage boundary age refers to Cohen et al. (2019)
7	Carbon isotope compostion of pedogenic carbonates (calcretes) measured in lab
8	Oxgen isotope compostion of pedogenic carbonates (calcretes) measured in lab
9	Mean oxygen isotope value of two or three measurements for the same calcrete sample
10	Mean carbon isotope value of two or three measurements for the same calcrete sample
11	Carbon-isotope value of calcrete calibrated with -8.98‰+δ13Cc (Ekart et al., 1999)
12	Carbon-isotope value of calcrete calibrated at 25°C with (δ13Cc+1000)/((11.98-0.12*T)/1000+1)-1000 (Romanek et al., 1992)
13	Carbon-isotope value of organic matters cited from Bougeault et al. (2017), Peti et al.(2017), and Xu et al. (2018)
14	Atmospheric carbon isotope calculated by (δ13Cr+18.67)/1.1 (Arens et al., 2000)
15	Atmospheric carbon dioxide estimated with S(z)=2500; δ13Cs=column 12; δ13Cr=column 13; δ13Ca=-6.5‰ at T=25˚C
16	Atmospheric carbon dioxide estimated with S(z)=2500; δ13Cs=column 12; δ13Cr=column 13; δ13Ca=column 14
17	Atmospheric carbon dioxide estimated with S(z)=2000; δ13Cs=column 11; δ13Cr=column 13; δ13Ca=column 14
18	Atmospheric carbon dioxide estimated with S(z)=2000; δ13Cs=column 12; δ13Cr=column 13; δ13Ca=column 14
References
Arens, N. C., Jahren, A. H., and Amundson, R.: Can C3 plants faithfully record the carbon isotopic composition of atmospheric carbon dioxide, Paleobiology, 26, 137–164, 2000,
Bougeault, C., Pellenard, P., Deconninck, J. F., Hesselbo, S. P., Dommergues, J. L:, Bruenau, L., Cocquerez, T., Laffont, R., Huret, E., and Thibault, N.: Climatic and palaeoceanographic changes during the Pliensbachian (Early Jurassic) inferred from clay mineralogy and stable isotope (C-O) geochemistry (NW Europe), Global Planet. Change, 149, 139-152, 2017.
Cohen, K. M., Harper, D. A. T., Gibbard, P. L., and Fan, J. X.: International Commission on Stratigraphy, URL: ttp://www.stratigraphy.org/ICSchart/ChronostratChart2019-05.pdf., 2019.
Ekart, D. D., Cerling, T. E., Montñez, I. P., and Tabor, N. J.: A 400 million year carbon isotope record of pedogenic carbonate: implications for paleoatmospheric carbon dioxide, Am. J. Sci., 299, 805-827, 1999.
Romanek, C., Grossman, E. and Morse, J.: Carbon isotopic fractionation in synthetic aragonite and calcite: effects of temperature and precipitation rate Geochim. Cosmochim. Ac., 56, 419-430, 1992.
Peti, L., Thibault, N., Clémence, M. E., Korte, C., Dommergues, J. L., Bougeault, C., Pellenard,P., Jelby, M. E., and Ullmann, C. V.: Sinemurian-Pliensbachian Calcareous Nannofossil Biostratigraphy and Organic Carbon Isotope Stratigraphy in the Paris Basin: Calibration to the Ammonite Biozonation of NW Europe, Palaeogeogr. Palaeoclimatol. Palaeoecol., 468, 142–161, 2017.
Xu, W. M, Ruhl, M., Jenkyns, H. C., Leng, M. J., Huggett, J. M., Minisini, D., Ullmann, C. V., Riding, J. B., Weijers, J. W. H., Storm, M. S., Percival, L. M. E., Tosca, N. J., Idiz, E. F., Tegelaar, E. W., Hesselbo, S. P.: Evolution of the Toarcian (Early Jurassic) carbon-cycle and global climatic controls on local sedimentary processes (Cardigan Bay Basin, UK), Earth Planet. Sci. Lett., 484, 39…
