# Supplementary material for: Early Jurassic climate and atmospheric CO 2 concentration in the Sichuan paleobasin, southwestern China
Source: Copernicus journal article supplement (doi:10.5194/cp-16-2055-2020), 2020-11-04
Supplement: Supplementary file 6 [file Table S5-pCO2 uncertainty using organic matter.xlsx]

## Sheet: CO2
Table S5 Calculation of pCO2 and Gaussian error propagation using the atmosphere carbon isotope determination of global organic matter isotope compostion for the Early Jurassic Sichuan paleobasin
			Parameters								Standard error						Gaussian error propagation
Smple	Depth	Age															mean	1σ
	(m)	(Ma)	d13Cc	T	d13Com	d13Ca CO2	S(z)	d13Cs CO2	d13Cr CO2		d13Cc	T	d13Com	d13Ca CO2	S(z)		[CO2]atm	[CO2]atm
			(‰)	(oC)	(‰)	(‰)	(ppmV)	(‰)	(‰)		(‰)	(oC)	(‰)	(‰)	(ppmV)		(ppmV)	(ppmV)		S(z)	Cr	Cc	Ca	T	Uncertainty
J1Z-01-01	4.5	198.78	-7.81	25	-26.93	-7.50909	2000	-16.6406	-27.93		0.1	2	0.1	0.1	766		1315.87	513.026		253995	483.94	1295.23	207.656	7214.32	0.389876
J1z-02-001	6.5	198.55	-8.1	25	-26.97	-7.54545	2000	-16.928	-27.97		0.1	2	0.1	0.1	766		1227.96	479.014		221190	458.388	1162.65	171.288	6472.08	0.390089
J1z-02-002	7.3	198.45	-7.8	25	-27.18	-7.73636	2000	-16.6307	-28.18		0.1	2	0.1	0.1	766		1409.65	549.304		291489	510.094	1443.55	251.19	8040.6	0.389673
J1Z-02-01	9.8	198.16	-7.37	25	-27.62	-8.13636	2000	-16.2045	-28.62		0.1	2	0.1	0.1	766		1769.2	688.724		459145	619.91	2143.82	480.847	11951.4	0.389286
J1z-02-02	12.7	197.83	-7.4	25	-27.52	-8.04545	2000	-16.2342	-28.52		0.1	2	0.1	0.1	766		1711.34	666.265		429605	601.779	2017.71	436.752	11247.7	0.389324
J1Z-03-01	16.3	197.41	-6.9	25	-27.37	-7.90909	2000	-15.7387	-28.37		0.1	2	0.1	0.1	766		1877.95	731.037		517325	658.259	2409.69	575.294	13446.4	0.389275
J1Z-04-01	31.7	195.63	-6.27	25	-26.7	-7.3	2000	-15.1143	-27.7		0.1	2	0.1	0.1	766		1869.2	727.745		512516	660.84	2408.24	572.18	13455.3	0.389336
J1Z-05-01	39.6	194.71	-5.83	25	-26.5	-7.11818	2000	-14.6782	-27.5		0.1	2	0.1	0.1	766		1994.29	776.457		583408	706.039	2742.01	695.874	15333.7	0.389341
J1Z-05-02	45.5	194.03	-5.87	25	-26.05	-6.70909	2000	-14.7178	-27.05		0.1	2	0.1	0.1	766		1759.77	685.309		454267	629.136	2164.86	482.819	12105.2	0.38943
J1z-06-01	56.7	192.73	-6.4	25	-26.03	-6.69091	2000	-15.2431	-27.03		0.1	2	0.1	0.1	766		1520.41	592.386		339091	551.718	1664.42	316.055	9297.04	0.389623
J1z-07-01	69.8	191.21	-6.1	25	-26.57	-7.18182	2000	-14.9458	-27.57		0.1	2	0.1	0.1	766		1891.07	736.277		524584	669.431	2467.21	593.266	13789.5	0.389343
J1Z-08-01	84.7	190.31	-6.11	25	-27.48	-8.00909	2000	-14.9557	-28.48		0.1	2	0.1	0.1	766		2373.88	924.285		826639	836.234	3894.25	1167.81	21764.9	0.389356
J1Z-10-01	89.5	190.06	-7.18	25	-27.39	-7.92727	2000	-16.0162	-28.39		0.1	2	0.1	0.1	766		1754.09	682.892		451339	616.729	2115.76	470.247	11799.5	0.389313
J1Z-10-02	94.4	189.81	-7.86	25	-27.08	-7.64545	2000	-16.6901	-28.08		0.1	2	0.1	0.1	766		1350.86	526.549		267680	493.274	1348.22	223.066	7508.7	0.389789
J1z-11-01	106.7	189.18	-7.1	25	-26.35	-6.98182	2000	-15.9369	-27.35		0.1	2	0.1	0.1	766		1368.85	533.608		274857	503.194	1390.14	233.653	7754.03	0.389824
J1z-11-02	111.7	188.92	-7.6	25	-25.98	-6.64545	2000	-16.4324	-26.98		0.1	2	0.1	0.1	766		1075.28	420.145		169606	421.285	969.855	120.711	5404.28	0.390731
J1Z-12-01	148.9	187.01	-8.08	25	-26.15	-6.8	2000	-16.9082	-27.15		0.1	2	0.1	0.1	766		980.771	383.667		141102	394.938	854.176	94.1435	4755.08	0.391189
J1Z-14-01	176.1	185.61	-7.35	25	-26.45	-7.07273	2000	-16.1847	-27.45		0.1	2	0.1	0.1	766		1312.94	511.953		252865	486.018	1298.5	207.62	7239.21	0.389928
J1Z-14-02	187.3	185.03	-5.98	25	-25.88	-6.55455	2000	-14.8269	-26.88		0.1	2	0.1	0.1	766		1636.06	637.285		392644	589.685	1897.77	391.154	10609.4	0.389523
J1z-15-01	194.3	184.67	-7	25	-25.75	-6.43636	2000	-15.8378	-26.75		0.1	2	0.1	0.1	766		1196.74	467.094		210086	456.549	1135.7	162.037	6336.06	0.390305
J1Z-16-01	213.7	183.67	-5.54	25	-25.97	-6.63636	2000	-14.3908	-26.97		0.1	2	0.1	0.1	766		1881.12	732.507		519077	671.083	2460.67	588.487	13768.4	0.389399
J1Z-18-01	252.7	182.6	-3.52	25	-25.1	-5.84545	2000	-12.3887	-26.1		0.1	2	0.1	0.1	766		2574.14	1003.12		971993	942.498	4800.23	1547.65	26968.5	0.389691
J1Z-19-01	272.3	181.87	-6.09	25	-24.5	-5.3	2000	-14.9359	-25.5		0.1	2	0.1	0.1	766		1094.23	427.637		175636	434.601	1012.88	128.954	5661.2	0.390812
J1Z-20-01	294.3	181.04	-5.63	25	-27	-7.57273	2000	-14.48	-28		0.1	2	0.1	0.1	766		2385.56	928.948		834794	845.793	3959.83	1192.81	22152.8	0.389404
J1Z-22-01	324.5	179.91	-4.14	25	-25.8	-6.48182	2000	-13.0032	-26.8		0.1	2	0.1	0.1	766		2609.95	1016.97		999224	948.834	4908.45	1601.7	27542.2	0.38965
J1z-23-01	334.8	179.52	-8	25	-26.9	-7.48182	2000	-16.8289	-27.9		0.1	2	0.1	0.1	766		1238.78	483.207		225106	461.874	1179.37	175.647	6566.43	0.390067
	Column notes:														Mean		1660.77	647.131		0.389658
	D-J	: Refer to Table S4 and text.
	L	: From the lab (refer to text).
	M	: 25˚C is a typical monthly temperature for the temporate latitudes, and was chosen as formation temperature for the pedogenic carbonate (Ekart et al., 1999). We herein use ±2˚C as the temporal error.
	N	: Lab error cited from Xu et al. (2018) and Storm et al. (2020).
	O	: Lab error cited from Xu et al. (2018) and Storm et al. (2020).
	P	: Adopted for the standard error of soil carbonate transfer function with S(z) by Breecker and Retallack (2014).
	R	: Same as the Table S4.
	S	: Errors using Gaussian propagation (Breecker and Retallack, 2014).
	U-AB	: Standard eorrs by parameters (formulas refer to the appendix of Breecker and Retallack (2014).
References cited:
	Breecker, D. O. and Retallack, G. J.: Refining the pedogenic carbonate atmospheric CO2 proxy and application to Miocene CO2, Palaeogeogr. Palaeoclimatol. Palaeoecol., 406, 1-8, 2014.
	Ekart, D. D., Cerling, T. E., Montñez, I. P., and Tabor, N. J.: A 400 million year carbon isotope record of pedogenic carbonate: implications for paleoatmospheric carbon dioxide, Am. J. Sci., 299, 805-827, 1999.
	Storm, M. S., Hesselbo, S. P., Jenkyns, H. C., Ruhl, M., Ullmann, C. V., Xu, W., Leng, M. J., Riding, J. B., Gorbanenko, O.: Orbital pacing and secular evolution of the Early Jurassic carbon cycle. PNAS, 117(8), 3974-3982, doi, 10.1073/pnas.1912094117, 2020.
	Xu, W. M, Ruhl, M., Jenkyns, H. C., Leng, M. J., Huggett, J. M., Minisini, D., Ullmann, C. V., Riding, J. B., Weijers, J. W. H., Storm, M. S., Percival, L. M. E., Tosca, N. J., Idiz, E. F., Tegelaar, E. W., Hesselbo, S. P.: Evolution of the Toarcian (Early Jurassic) carbon-cycle and global climatic controls on local sedimentary processes (Cardigan Bay Basin, UK), Earth Planet. Sci. Lett., 484, 39…
