# Supplementary material for: Early Jurassic climate and atmospheric CO 2 concentration in the Sichuan paleobasin, southwestern China
Source: Copernicus journal article supplement (doi:10.5194/cp-16-2055-2020), 2020-11-04
Supplement: Supplementary file 7 [file Table S6-J1 Composite pCO2 Data by stomata.xlsx]

## Sheet: pCO2 stomata
Table S6 Global pCO2 data of the Latest Triassic - Early Jurassic by stomatal method
Formation or identifier	Location	Age	Age (Ma) by authors	Age (Ma) adjusted	Samp-les	SI	σ (±)	SR	pCO2: SI/SR	Mean pCO2	Species for stomata	Reference
Höganas and Hörö Sandstone	Scania, S Sweden	Rha		202.9		8	0.3		SI	1200		McElwain et al., 1999
		Rha		202.7		7	0.3		SI	1290
		Rha		202.4		9.2	0.3		SI	1260
		Rha				8.9	0.9		SI
		Rha		202.1		9.8	0.4		SI	1320
		Rha				10.7	0.3		SI
		Rha		201.8	2	7.9	0.2		SI	1590
		Rha			2	9.9	1.1		SI
		Rha	205.7	201.3	2	8.1	0.6		SI
		Het	205.7	201.2	2	3.8	0.3		SI	2160
		Het		201.1	2	3.9	0.4		SI	1980
		Het		201	2	10.1	1.1		SI	840
	Jameson Land, Greenland		202.2	201	?	4.7	0.3		SI	1442.55
		M. Het	201.2	200	6	6.8	0.7		SI	997.059	"Ginkgoites" obovatus
		Het			2	10.1	0.4		SI
		E. Het	200.2	201	18	8.5	0.6		SI	797.647	"Ginkgoites" acosmia
	Yorkshire, England		183	183.1					SI	950		McElwain et al., 2005
			183	183					SI	1050
			187.6	183					SI	490
			203	200					SI	1194.39		Retallack, 2001
			203	200					SI	1993.92
beds of Postera, Contorta, Triletes	Germanic Basin, Germany	Rha		201.4	4	4.26		2.66	SR	1596	Lepidopteris ottonis and Ginkgoites	Bonis et al., 2010
		Rha		201.8	4	3.57		3.17	SR	1902
		Rha		201.9	3	2.53		4.47	SR	2682
		Rha		202	2	2.45		4.63	SR	2778
		Rha		202	4	3.35		3.38	SR	2028
		Rha		202	7	3.16		3.58	SR	2148
		Rha		202.1	6	3.54		3.2	SR	1920
		Rha		202.2	2	3.12		3.63	SR	2178
		Rha		202.5	5	2.92		3.88	SR	2328
		Rha		202.7	7	2.47		4.58	SR	2748
?	Astartekløft in Jameson Land, East Greenland	Het		198		5.39	0.43		SR	1354	Ginkgo	Steinthorsdottir et al., 2011
?		Het		199		5.78	0.24		SR	1223
?		Het		199.8.		2.59	0.55		SR	2971
?		Rha		201.4		3.18	0.16		SR	2184
?		Rha		201.8		4.11	0.3		SR	1673
?		Rha		202		8.19	0.81		SR	932
?		Rha		202.3		6.2	0.4		SR	1266
?		Rha		202.6		7.99	0.62		SR	949
Lower Marburg Subgroup	Eeastern Australia	Late Pls	184	184	10	8.88	0.48		SI	855.7		Steinthorsdottir and Vajda, 2015
Yima	Henan, China	E. Toa		182	13	5.6	1.9	3.6	SR	2160	Ginkgo yimaensis	Chen et al., 2001
Dzungaria	Xinjiang, China	L. Sin		192	28	6.7	0.04	1.4	SR	840	Ginkgo obrutschewi
	Suiskiou, China	E. Rha	204.4	205	3	7	0.3		SI	968.571	cf. Lepidoperis ottonis	Sze, 1953
	Astarte River, Greenland	E. Rha	202.2	204	6	6.9	2.1		SI	982.609	Lepidoperis ottonis	Townrow 1960
	Bjuv, Sweden	M. Rha	203.5	204.5	1	8.9	0		SI	761.798	"Ginkgoites" obovatus	Florin 1937
	Bjuv, Sweden	M. Rha	202.2	204	4	7.5	1		SI	904	Lepidoperis ottonis	Dobruskina 1980; Lindström & Erlström,2006
	Billesholm, Sweden	L. Rha	203.2	203.2	5	6	0.6		SI	1130	"Ginkgoites" troedssoni	Lundblad 1959; Lindström & Erlström, 2006
	NW Scania Sweden	L. Rha	203.2	203.2	25	5.9	0.2		SI	1149.15	"Ginkgoites" troedssoni	Beerling et al. 1998; Lindström and Erlström, 2006
		L. Rha	203.2	203.2	25	6.5	0.4		SI	1043.08	"Ginkgoites" marginata
		E. Het	199.2	200	25	5.7	0.3		SI	1189.47
x	Komló, Hungary	E. Sin		199	1	5.4	0.2		SI	1255.56	"Ginkgoites" marginata	Barbacka & Wcislo-Luraniec 2002
		E. Sin		198	1	7.5	0.4		SI	904	"Ginkgoites" minuta
	Gradzanowo, Poland	E. Rha		203	1	7.1	0.6		SI	954.93	"Ginkgoites" acosmia
	Bayreuth, Germany	M. Het	198.2	200	2	7.2	0.5		SI	941.667	Ginkgo taeiata	Collinson et al. 1998
	Yagnob, uzbekistan	E. Sin	205.5	198	2	7.6	0.6		SI	892.105	Ginkgo ferganensis	Khudaiberdyev et al. 1971
	Sulyakta, Uzbekistan	E. Baj	165.8	170	4	7.1	0.7		SI	954.93	Ginkgo suluktensis
Yaojia	Aganzhen, China	M. Pls		186	13	5.8	0.2	4.5	SR	1252	Ginkgo aganzhenense	Xie et al., 2006
Ya'an	Yaojie, China	E. Aal		173	20	6.1	0.81	4	SR	1190	Ginkgo huttoni
	Heilgersdorf, Germany	Rha	204.4	204	1	6.8			SI	997.059	Lepidopteris sp. indet.	Kelber & van Konijnenberg-van Cittert, 1997
	Höllviken, Sweden	Rha	202.2	202	3	6.3	1.9		SI	1076.19	cf. "Lepidopteris" ottonis	Lundblad, 1949
	Bosarp, Sweden	Rha	202.2	202	1	8.7			SI	779.31	"Lepidopteris" ottonis
	Stabbarp	Rha	202.2	202	1	7.3	?		SI	928.767	"Ginkgoites" marginata	Lundblad, 1959
	Hälsingborg, Sweden	Pli-Toar	190.4	182	3	6.1	1.3		SI	1111.48	"Ginkgoites" marginata
	Rawicz, Poland	Rha	202.2	202	2	8.1	0.4		SI	837.037	"Lepidopteris" ottonis	Piwocki, 1970
	Astarte, Greenland	Rha	202.2	202	3	7.3	?		SI	928.767	"Ginkgoites" obovatus	Harris 1935
	Vardekløf, Greenland	Liassic	198.2	195	2	4	?		SI	1695	"Ginkgoites"
	Pennyhilm and Whitby, England	Aal	177.5	172	2	3.8	?		SI	1784.21	Ginkgo	Harris 1974
	Anina, Romania	Het-Sim	194.4	199	6	6	1.6		SI	1130	Ginkgo marginata	Czier, 1998
	Derwent River, England	Ael	176.5	172	1	6.9	?		SI	982.609	Ginkgo huttoni	McElwain & Chaloner, 1996
Yanchang	Huating of Gansu, NW China	T3	204.8	204.8		3.7		3.27	SR	1962	Gingkoites magnifolius	Wu et al., 2016
Ya'an	Anganzhen of Gansum, China	J1dx	193	193		5.8		2.09	SR	1252	Ginkgo aganzhenense	Sun et al., 2007
		J2y2	183	183		6.1		1.98	SR	1190	Ginkgo huttoni
		J2y4-5	171	171	15	3.83	0.3	3.16	SR	1896
		J2y4-4	170	170	14	3.97	0.27	3.05	SR	1830
Age adjustment by the International Chronostratigraphy Chart (Cohen et al., 2019)
SI, Stomatal index
SR, stomotal ratio
Barbacka, M. and Wcislo-Luraniec, E.: Ginkgoites acosmia Harris from the Polish Rhaetian, Acta Palaeobotanica, 42, 7-11, 2002. Beerling, D. J. and Royer, D. L.: Reading a CO2 signal from fossil stomata, The New Phytologist, 153, 387-397, doi:0. 1046/j. 0028-646X. 2001. 00335. x, 2002. Beerling, G. J., McElwain, J. C., and Osborne, C. P.: Stomatal responses of the “living fossil” Ginkgo biloba L t…
Chen, L. Q, Li, C. S., Chaloner, W. G., Beerling, D. J., Sun, Q. G., Collinson, M. E., and Mitchell, P. L.: Assessing the potential for the stomatal characters of extant and fossil Ginkgo leaves to signal atmospheric CO2 change, Am. J. Bot., 88(7), 1309–1315, 2001. Collinson, M. E., Mösle, B., Finch, P., Scott, A. C., andWilson, R.: The preservation of plant cuticle in the fossil record: a chemic…
Kelber, K. P. and van Konijnenberg-van Cittert, J. H. A.: A new Rhaetian flora from the neighbourhood of Cobourg (Germany) - preliminary results. Fourth European Paleobotanical and Palnylogical Conference Proceedings, Heerlen 1994, Mededelingen Nederlandische Institut Toegepaste Geowetenschappen TNO, 58, 101-113, 1997. Khudaiberdyev, R., Gomolitsky, N. P., and Lobanova, A. V.: Materiali k yurskoi…
Oishi, S.: A study of the cuticles of some Mesozoic gymnospermous plants from China and Manchuria, Science Reports of Tohoku Imperial Uni., Second Series (Geol.), 12(2B), 239-252, 1933. Piwocki, M.: Lepidopteris ottonis zretyku południowej części monokliny przedsudeckiej (Lepidopteris ottonis) from the Rhaetic deposits of the southern part of the Fore-Sudetic Monocline), Kwartalnik Geologiczny, 1…
