# Supplementary material for: Early Jurassic climate and atmospheric CO 2 concentration in the Sichuan paleobasin, southwestern China
Source: Copernicus journal article supplement (doi:10.5194/cp-16-2055-2020), 2020-11-04
Supplement: Supplementary file 8 [file Table S7-J1 Composite pCO2 Data by paleosol.xlsx]

## Sheet: pCO2-calcrete
Table S7 Global pCO2 data of the Latest Triassic - Early Jurassic estimated by carbon isotope of pedogenic carbonates
Formation or identifier	Location	Age	Age (Ma) by author	Age (Ma) adjusted	Sam-ples	δ13Cc	Sz by author	pCO2 by author	Reference	δ13Csc	δ13Cr	δ13Ca	pCO2 updated
Kayenta	Utah, America	Toa	175	177	3	-4.5	5000	4560	Ekart et al., 1999	-13.36	-27.2	-7.75455	3410.82
Aztec	Nevada, America	Toa	177	179	2	-7.3	5000	1920		-16.1351	-27.4	-7.93636	1704.03
McCoy Brook	Connecticut, America	Het	205	200	4	-5.9	5000	3010		-14.7476	-25.67	-6.36364	1582.88
New Haven Arkose	Connecticut, America	J1	208	190	7	-7.64	5000	2500	Cerling et al., 1991	-16.4721	-27.39	-7.92727	1553.79
		J1	198	189	6	-6.62	5000	3010	Suchecki et al., 1988	-15.4612	-25.56	-6.26364	1263.67
McCoy Brook	Texas, America	Het	?	200.5	6	-7.1	5000	2480	Tanner et al., 2001	-15.9369	-26.03	-6.69091	1256.25
Boonton	Newark, New Jersey, America	Het	200.36	200.36	2	-5.61	3000	2496	Schaller et al., 2011	-14.4601	-25.67	-6.36364	1710.07
			200.48	200.48	2	-5.11	3000	3131		-13.9646	-26.03	-6.69091	2139.2
			200.91	200.91	3	-3.63	3000	5273		-12.4978	-25.17	-5.90909	2544.66
			200.91	200.91	3	-3.98	3000	4941		-12.8447	-25.17	-5.90909	2317.36
Towaco			200.91	200.91	2	-6.04	3000	1949		-14.8863	-25.17	-5.90909	1335.47
			201.02	201.02	2	-6.19	3000	2356		-15.035	-26.04	-6.7	1612.38
			201.07	201.07	3	-4.36	3000	3708		-13.2213	-25.91	-6.58182	2531.15
			201.12	201.12	2	-5.79	3000	2642		-14.6385	-26.07	-6.72727	1806.58
			201.16	201.16	1	-5.05	3000	3460		-13.9051	-26.36	-6.99091	2363.49
			201.2	201.2	3	-5.55	3000	3014		-14.4007	-26.34	-6.97273	2061.19
			201.21	201.21	2	-4.53	3000	3657		-13.3898	-26.03	-6.69091	2494.39
			201.21	201.21	2	-4.23	3000	4015		-13.0924	-26.08	-6.73636	2738.27
			201.22	201.22	2	-4.01	3000	4050		-12.8744	-25.88	-6.55455	2759.4
			201.23	201.23	2	-4.69	3000	4070		-13.5483	-26.62	-7.22727	2780.8
			201.23	201.23	3	-4.46	3000	4234		-13.3204	-26.53	-7.14545	2891.16
Feltville			201.26	201.26	3	-4.85	3000	3453		-13.7069	-26.14	-6.79091	2356.3
			201.28	201.28	2	-4.16	3000	3577		-13.0231	-25.55	-6.25455	2434.62
			201.39	201.39	3	-4.64	3000	3584		-13.4988	-26.06	-6.71818	2441.05
			201.45	201.45	2	-3.72	3000	4228		-12.587	-25.74	-6.42727	2878.81
			201.49	201.49	3	-4.56	3000	4434		-13.4195	-26.81	-7.4	3026.33
Passaic			201.51	201.51	3	-8.58	3000	1065		-17.4037	-25.67	-6.36364	720.87
			201.73	201.73	3	-6.91	3000	1787		-15.7486	-25.75	-6.43636	1227.36
			201.81	201.81	3	-6.2	3000	2242		-15.0449	-25.86	-6.53636	1534.67
			201.88	201.88	3	-4.96	3000	2253		-13.8159	-24.59	-5.38182	1537.15
			202.07	202.07	1	-6.78	3000	2263		-15.6197	-26.5	-7.11818	1551.92
			202.17	202.17	2	-7.7	3000	1597		-16.5315	-26.16	-6.80909	1099.22
			202.51	202.51	2	-6.11	3000	2419		-14.9557	-26.06	-6.71818	1655.59
			202.95	202.95	2	-6.41	3000	2231		-15.253	-26.06	-6.71818	1528.24
			203.09	203.09	2	-6.87	3000	1947		-15.7089	-26.02	-6.68182	1334.99
			203.57	203.57	2	-7.68	3000	1532		-16.5117	-26.02	-6.68182	1062.63
			203.71	203.71	2	-5.47	3000	2782		-14.3214	-25.94	-6.60909	1901.57
			203.95	203.95	2	-7.84	3000	1475		-16.6703	-26.03	-6.69091	1016.94
1) Age (Ma) in adjusted column is based on Cohen et al. (2019).
2) δ13Cr aged as 177 Ma and 179 Ma were cited from Xu et al., 2018; 189 Ma and 190 Ma from Peti et al., 2017; those older than 200 Ma cited from Schaller et al., 2011.
3) Updated pCO2 refers to text and parameters are same as the colomn 18 (Sz=2000 ppmV) in Table S4.
References cited
Cerling, T. E.: Stable carbon isotopes in palaeosol carbonates, in: Palaeoweathering, palaeosurfaces and related continental deposits, edited by: Thiry, M. and Simm-CoinÇon, R., Spec. P Intl. Asso. Sedi., 27, 43-60, 1999. Cohen, K. M., Harper, D. A. T., Gibbard, P. L., and Fan, J. X.: International Commission on Stratigraphy, URL: ttp://www.stratigraphy.org/ICSchart/ChronostratChart2019-05.pdf., …
