# Supplementary material for: Early Jurassic climate and atmospheric CO 2 concentration in the Sichuan paleobasin, southwestern China
Source: Copernicus journal article supplement (doi:10.5194/cp-16-2055-2020), 2020-11-04
Supplement: Supplementary file 9 [file Table S8-pCO2 uncertainty using carbonate.xlsx]

## Sheet: CO2
Table S8 Calculation of pCO2 and Gaussian error propagation using the atmosphere carbon isotope determination of mairne fossil carbonate carbon isotope compostion for the Early Jurassic Sichuan paleobasin
				Parameters								Standard error						Gaussian error propagation
Smple	Depth	Age																mean	1σ
	(m)	(Ma)	d13Cocean	d13Cc	T	d13Com	d13Ca CO2	S(z)	d13Cs CO2	d13Cr CO2		d13Cc	T	d13Com	d13Ca CO2	S(z)		[CO2]atm	[CO2]atm
			(‰)	(‰)	(oC)	(‰)	(‰)	(ppmV)	(‰)	(‰)		(‰)	(oC)	(‰)	(‰)	(ppmV)		(ppmV)	(ppmV)		S(z)	Cr	Cc	Ca	T	Uncertainty
J1Z-01-01	4.5	198.78	2.01	-7.81	25	-26.93	-4.49	2000	-16.6406	-27.93		0.1	2	0.1	0.1	766		988.913	384.316		143454	273.326	594.385	66.2403	3310.66	0.388625
J1z-02-001	6.5	198.55	1.73	-8.1	25	-26.97	-4.77	2000	-16.928	-27.97		0.1	2	0.1	0.1	766		947.637	368.584		131729	272.992	577.377	60.7521	3214.05	0.388951
J1z-02-002	7.3	198.45	2.04	-7.8	25	-27.18	-4.46	2000	-16.6307	-28.18		0.1	2	0.1	0.1	766		1030.17	400.024		155674	272.424	608.894	71.6459	3391.54	0.388308
J1Z-02-01	9.8	198.16	2.59	-7.37	25	-27.62	-3.91	2000	-16.2045	-28.62		0.1	2	0.1	0.1	766		1161.02	449.84		197731	266.964	649.333	89.1776	3619.93	0.387454
J1z-02-02	12.7	197.83	2.32	-7.4	25	-27.52	-4.18	2000	-16.2342	-28.52		0.1	2	0.1	0.1	766		1162.56	450.636		198257	277.712	676.136	93.0148	3769.12	0.387624
J1Z-03-01	16.3	197.41	1.26	-6.9	25	-27.37	-5.24	2000	-15.7387	-28.37		0.1	2	0.1	0.1	766		1400.51	543.182		287721	366.105	1030.52	177.953	5750.41	0.387845
J1Z-04-01	31.7	195.63	2.44	-6.27	25	-26.7	-4.06	2000	-15.1143	-27.7		0.1	2	0.1	0.1	766		1321.34	512.272		256109	330.227	886.748	142.878	4954.44	0.387693
J1Z-05-01	39.6	194.71	2.63	-5.83	25	-26.5	-3.87	2000	-14.6782	-27.5		0.1	2	0.1	0.1	766		1394.94	540.683		285438	345.436	969.157	166.574	5419.67	0.387602
J1Z-05-02	45.5	194.03	1.56	-5.87	25	-26.05	-4.94	2000	-14.7178	-27.05		0.1	2	0.1	0.1	766		1441.38	559.837		304758	422.074	1216.79	217.306	6803.91	0.388404
J1z-06-01	56.7	192.73	2.45	-6.4	25	-26.03	-4.05	2000	-15.2431	-27.03		0.1	2	0.1	0.1	766		1161.68	451.163		197957	322.086	783.734	107.714	4377.73	0.388371
J1z-07-01	69.8	191.21	2.49	-6.1	25	-26.57	-4.01	2000	-14.9458	-27.57		0.1	2	0.1	0.1	766		1342.59	520.526		264413	337.422	917.699	150.725	5129.12	0.387704
J1Z-08-01	84.7	190.31	1.16	-6.11	25	-27.48	-5.34	2000	-14.9557	-28.48		0.1	2	0.1	0.1	766		1714.95	664.706		431420	436.427	1466.15	318.083	8194.32	0.387595
J1Z-10-01	89.5	190.06	0.95	-7.18	25	-27.39	-5.55	2000	-16.0162	-28.39		0.1	2	0.1	0.1	766		1355.67	526.088		269591	368.381	1009.76	167.777	5631.39	0.388065
J1Z-10-02	94.4	189.81	1.07	-7.86	25	-27.08	-5.43	2000	-16.6901	-28.08		0.1	2	0.1	0.1	766		1085.07	421.858		172709	318.264	737.36	92.8607	4106.6	0.388783
J1z-11-01	106.7	189.18	1.76	-7.1	25	-26.35	-4.74	2000	-15.9369	-27.35		0.1	2	0.1	0.1	766		1094.78	425.636		175813	321.869	750.411	95.5999	4185.7	0.388788
J1z-11-02	111.7	188.92	0.7	-7.6	25	-25.98	-5.8	2000	-16.4324	-26.98		0.1	2	0.1	0.1	766		989.778	386.334		143705	356.95	776.689	86.6582	4327.91	0.390323
J1Z-12-01	148.9	187.01	2.84	-8.08	25	-26.15	-3.66	2000	-16.9082	-27.15		0.1	2	0.1	0.1	766		748.314	291.856		82142.1	229.912	422.723	31.9048	2353.24	0.390018
J1Z-14-01	176.1	185.61	2.09	-7.35	25	-26.45	-4.41	2000	-16.1847	-27.45		0.1	2	0.1	0.1	766		1016.03	395.01		151430	291.056	644.481	74.4592	3593.02	0.388777
J1Z-14-02	187.3	185.03	2.87	-5.98	25	-25.88	-3.63	2000	-14.8269	-26.88		0.1	2	0.1	0.1	766		1208.74	469.12		214319	321.871	806.697	116.539	4509.81	0.388108
J1z-15-01	194.3	184.67	2.23	-7	25	-25.75	-4.27	2000	-15.8378	-26.75		0.1	2	0.1	0.1	766		972.62	378.69		138766	301.56	648.655	70.6946	3618.84	0.38935
J1Z-16-01	213.7	183.67	1.07	-5.54	25	-25.97	-5.43	2000	-14.3908	-26.97		0.1	2	0.1	0.1	766		1627.87	632.592		388721	502.554	1610.08	330.028	9009.08	0.388601
J1Z-18-01	252.7	182.6	1.65	-3.52	25	-25.1	-4.85	2000	-12.3887	-26.1		0.1	2	0.1	0.1	766		2234.24	868.529		732247	710.027	3098.76	878.338	17409.3	0.388736
J1Z-19-01	272.3	181.87	3.27	-6.09	25	-24.5	-3.23	2000	-14.9359	-25.5		0.1	2	0.1	0.1	766		900.731	351.197		119011	294.487	603.173	59.2083	3371.27	0.389902
J1Z-20-01	294.3	181.04	1.01	-5.63	25	-27	-5.49	2000	-14.48	-28		0.1	2	0.1	0.1	766		1832.89	710.979		492802	499.295	1785.55	415.679	9989.08	0.3879
J1Z-22-01	324.5	179.91	1.91	-4.14	25	-25.8	-4.59	2000	-13.0032	-26.8		0.1	2	0.1	0.1	766		2023.07	785.092		600372	570.096	2246.08	578.226	12603.1	0.388069
J1z-23-01	334.8	179.52	1.61	-8	25	-26.9	-4.89	2000	-16.8289	-27.9		0.1	2	0.1	0.1	766		969.854	377.252		137978	283.104	607.824	65.9912	3384.22	0.388978
	Column notes:															Mean		1274.13	494.846		0.38838
	D	Carbon isotope composition of (~179-196 Ma) belemnite from Cleveland Basin, UK. (Korte and Hesselbo, 2011), Pieniny Klippen Belt, Carpathians (Arabas et al., 2017); and that of (~196-199 Ma) oyster from SW Britain (Korte et al., 2009).
	E-K	: Refer to Table S4 and text.
	H	δ13Ca = δ13Cocean-6.5‰, given the carbon isotopic fractionation was balanced between sea-water and atmosphere at the time.
	M	: From the lab (refer to text).
	N	: 25˚C is a typical monthly temperature for the temporate latitudes, and was chosen as formation temperature for the pedogenic carbonate (Ekart et al., 1999). We herein use ±2˚C as the temporal error.
	O	: Lab error cited from Xu et al. (2018) and Storm et al. (2020).
	P	: Lab error cited from Xu et al. (2018) and Storm et al. (2020).
	R	: Adopted for the standard error of soil carbonate transfer function with S(z) by Breecker and Retallack (2014).
	S	: Same as the Table S4.
	T	: Errors using Gaussian propagation (Breecker and Retallack, 2014).
	V-AA	: Standard eorrs by parameters (formulas refer to the appendix of Breecker and Retallack (2014).
References cited:
	Arabas, A., Schlogl, J., and Meiste C.: Early Jurassic carbon and oxygen isotope records and seawater temperature variations: Insights from marine carbonate and belemnite rostra (Pieniny Klippen Belt, Carpathians), Palaeogeogr. Palaeoclimatol. Palaeoecol., 485, 119–135, 2017
	Breecker, D. O. and Retallack, G. J.: Refining the pedogenic carbonate atmospheric CO2 proxy and application to Miocene CO2, Palaeogeogr. Palaeoclimatol. Palaeoecol., 406, 1-8, 2014.
	Ekart, D. D., Cerling, T. E., Montñez, I. P., and Tabor, N. J.: A 400 million year carbon isotope record of pedogenic carbonate: implications for paleoatmospheric carbon dioxide, Am. J. Sci., 299, 805-827, 1999.
	Korte, C., Hesselbo, S. P., Jenkyns, H. C., Rickaby, R. E. M. , and Spötl, C.: Palaeoenvironmental significance of carbon- and oxygen-isotope stratigraphy of marine Triassic–Jurassic boundary sections in SW Britain, J. Geol. Soc., 166, 431-445, doi:10.1144/0016-76492007-177, 2009
	Korte, C., and Hesselbo, S. P.: Shallow marine carbon and oxygen isotope and elemental records indicate icehouse-greenhouse cycles during the Early Jurassic, Paleoceanography, 26, 1–18, 2011.
	Storm, M. S., Hesselbo, S. P., Jenkyns, H. C., Ruhl, M., Ullmann, C. V., Xu, W., Leng, M. J., Riding, J. B., Gorbanenko, O.: Orbital pacing and secular evolution of the Early Jurassic carbon cycle. PNAS, 117(8), 3974-3982, doi, 10.1073/pnas.1912094117, 2020.
	Xu, W. M, Ruhl, M., Jenkyns, H. C., Leng, M. J., Huggett, J. M., Minisini, D., Ullmann, C. V., Riding, J. B., Weijers, J. W. H., Storm, M. S., Percival, L. M. E., Tosca, N. J., Idiz, E. F., Tegelaar, E. W., Hesselbo, S. P.: Evolution of the Toarcian (Early Jurassic) carbon-cycle and global climatic controls on local sedimentary processes (Cardigan Bay Basin, UK), Earth Planet. Sci. Lett., 484, 39…
